# Supplementary material for: Flexible and Transparent Polymer-Based Optical Humidity Sensor
Source: MDPI journal article supplement (doi:10.3390/s21113674), 2021-05-25
Supplement: s1 [file s1]

## Supplementary materials

# Flexible and Transparent Polymer-Based Optical Humidity Sensor <sup>†</sup>

Katerina Lazarova <sup>1,\*</sup>, Silvia Bozhilova <sup>2</sup>, Sijka Ivanova <sup>2</sup>, Darinka Christova <sup>2</sup> and Tsvetanka Babeva <sup>1,\*</sup>

<sup>1</sup> Institute of Optical Materials and Technologies "Acad. J. Malinowski", Bulgarian Academy of Sciences, Akad. G. Bonchev str., bl. 109, 1113 Sofia, Bulgaria; klazarova@iomt.bas.bg (K.L.); babeva@iomt.bas.bg (T.B.);

<sup>2</sup> Institute of Polymers, Bulgarian Academy of Sciences, Akad. G. Bonchev Str., bl. 103-A, 1113 Sofia, Bulgaria; s.bozhilova@polymer.bas.bg (S.B.); sivanova@polymer.bas.bg (S.I.); dchristo@polymer.bas.bg (D. Ch.);

\* Correspondence: klazarova@iomt.bas.bg (K.L.); babeva@iomt.bas.bg (T.B); Tel.: +359 02-979-3521 (K.L.)

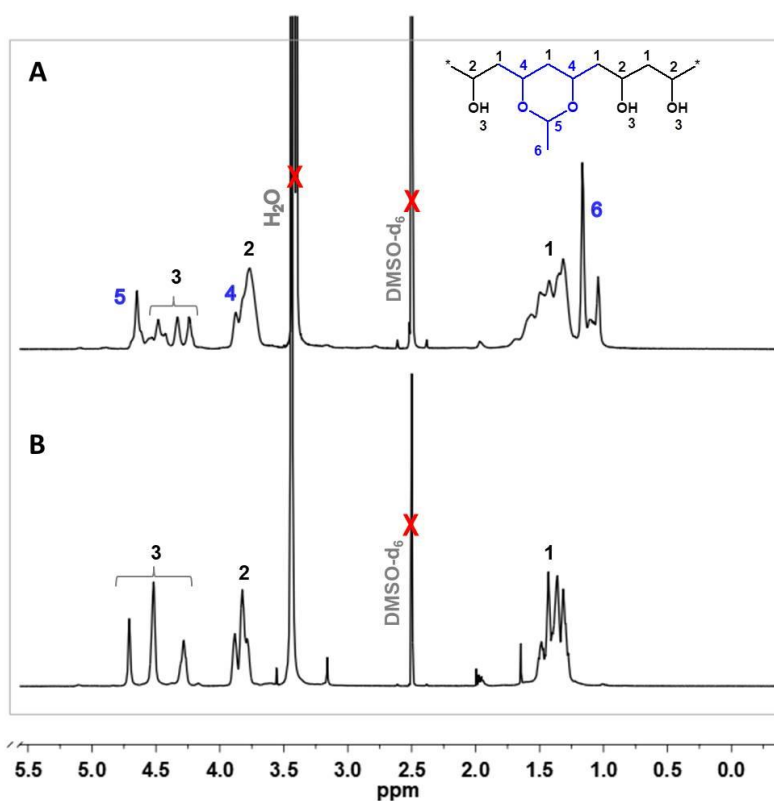

**Figure S1.** <sup>1</sup>H NMR (250 MHz; solvent DMSO-d<sub>6</sub>) spectrum of PVA-Ac (A) compared to the spectrum of starting PVA (B).

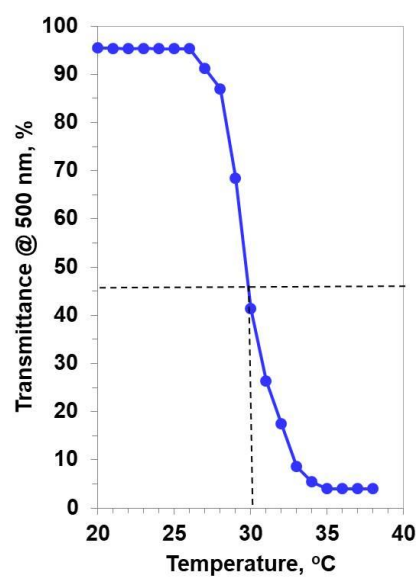

**Figure S2.** Clouding curve of PVA-Ac aqueous solution of concentration 5 g.L<sup>-1</sup>. The cloud point is counted at the inflection of transmittance-vs-temperature curve.
